# Supplementary material for: Sunitinib induces genomic instability of renal carcinoma cells through affecting the interaction of LC3-II and PARP-1
Source: PubMed Central journal article supplement (PMC5596573; doi:10.1038/cddis.2017.387), 2017-08-10

Figure 8

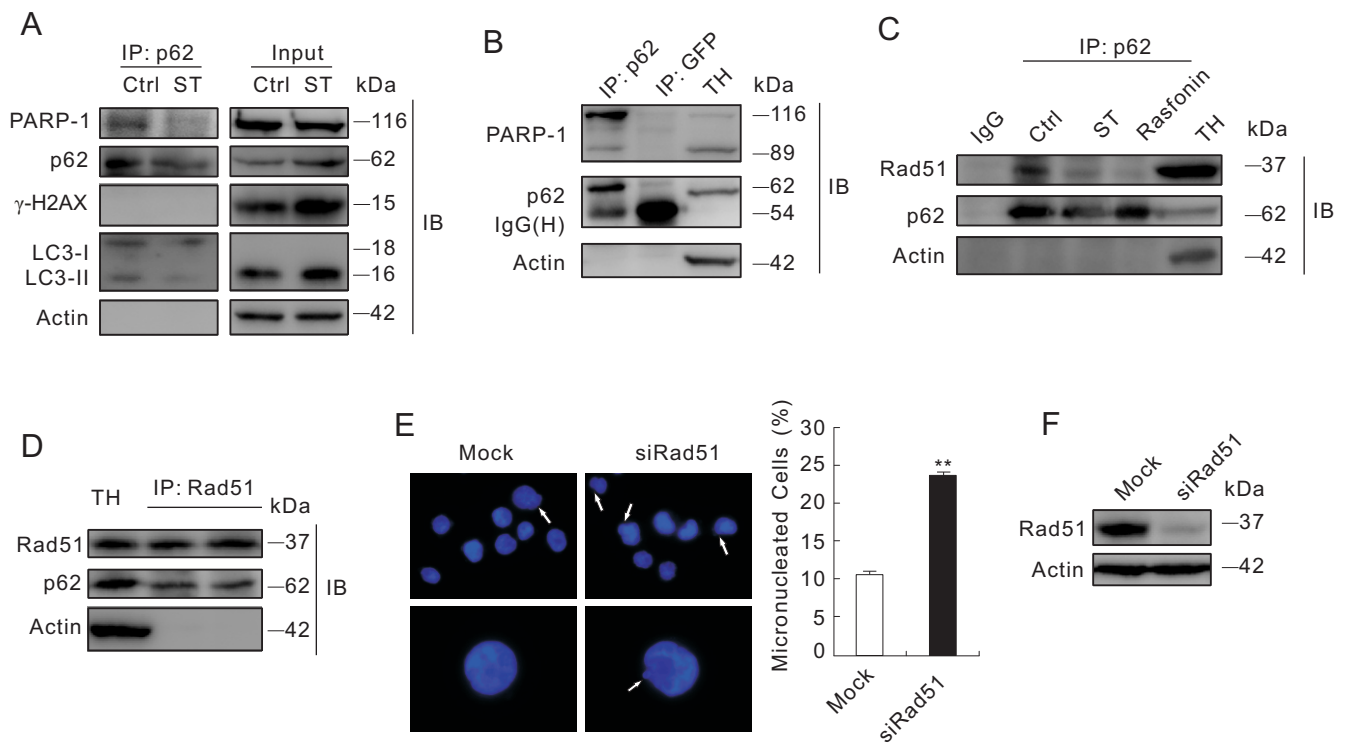

Supplement: cddis2017387x8.pdf [file cddis2017387x8.pdf]
